# Supplementary material
Source: PubMed Central journal article supplement (PMC3518930)
Supplement: NIHMS380108-supplement-supplement_1.pdf [file NIHMS380108-supplement-supplement_1.pdf]

ciated with genetic variation in interleukin 28B and the outcome of IFN therapy for chronic hepatitis C. *Gastroenterology* 2010; 139(2): 499–509.

32 Urban TJ, Thompson AJ, Bradrick SS *et al.* IL28B genotype is associated

with differential expression of intra-hepatic interferon-stimulated genes in patients with chronic hepatitis C. *Hepatology* 2010; 52(6): 1888–1896.

33 Dill MT, Duong FHT, Vogt JE *et al.* Interferon-induced gene expression

is a stronger predictor of treatment response than IL28B genotype in patients with hepatitis C. *Gastroenterology* 2011; 140(3): 1021–1031.

## APPENDIX 1

Members of the IDEAL investigators: Ira Jacobson, Weill Cornell Medical College, New York, NY, USA; Fred Poordad, Cedars-Sinai Medical Center, Los Angeles, CA, USA; Eric Lawitz, Alamo Medical Research, San Antonio, TX, USA; Jonathan McCone, Mt. Vernon Endoscopy Center, Alexandria, VA, USA; Mitchell L. Shiffman, Virginia Commonwealth University, Richmond,

VA, USA; Greg W. Galler, Kelsey Research Foundation, Houston, TX, USA; William M. Lee, University of Texas Southwestern Medical Center, Dallas, TX, USA; Robert Reindollar, Piedmont Healthcare, Statesville, NC, USA; John King, Louisiana State University, Shreveport, LA, USA; Reem Ghalib, The Liver Institute at Methodist Dallas Medical Center, Dallas, TX, USA;

Bradley Freilich, Kansas City Gastroenterology and Hepatology, Kansas City, MO, USA; Lisa M. Nyberg, Kaiser Permanente, San Diego, CA, USA; Zachary Goodman, Armed Forces Institute of Pathology, Washington, DC, USA; Navdeep Boparai, Kenneth Koury, Clifford A. Brass, Schering-Plough Corporation, now Merck & Co., Inc., Whitehouse Station, NJ, USA.

## SUPPORTING INFORMATION

Additional Supporting Information may be found in the online version of this article:

**Fig. S1** Quartiles of LDL\_C by HCV RNA level during treatment at week 2, week 4 and week 12 timepoints.

**Fig. S2** LDL\_C (</>130 mg/dL) by HCV RNA level during treatment at week 2, week 4 and week 12 timepoints.

**Table S1:** Measures of linkage disequilibrium between genome wide significant SNPs and rs12980275 by race.

**Table S2:** Multiple regression model for baseline LDL in Caucasians.

**Table S3:** Top GWAS association polymorphisms in association with total cholesterol in Caucasians.

**Table S4:** Top GWAS association polymorphisms in association with serum HDL-cholesterol in Caucasians.

**Table S5:** Top GWAS association polymorphisms in association with serum triglycerides in Caucasians.

**Table S6:** Multiple regression model for LDL at 24 weeks post treatment for non-SVR patients.

**Table S7:** Multiple regression model for LDL at 24 weeks post treatment for patients who attained SVR.

**Table S8:** Comparison between treatment response at the timepoint LDL was measured.

**Table S9:** Comparison between genotypes within treatment response levels at the timepoint LDL was measured.

**Table S10:** Multiple logistic regression model for SVR.

**Table S11:** Multiple logistic regression model results testing interaction between LDL and IL28B genotype (rs12980275) for SVR.

**Table S12:** Univariate comparison of SVR rates by each *IL28B* genotype (rs12980275).

Please note: Wiley-Blackwell are not responsible for the content or functionality of any supporting materials supplied by the authors. Any queries (other than missing material) should be directed to the corresponding author for the article.
